# Supplementary material for: Melatonin-Mediated Enhancement of Photosynthetic Capacity and Photoprotection Improves Salt Tolerance in Wheat
Source: MDPI journal article supplement (doi:10.3390/plants12233984), 2023-11-27
Supplement: s1 [file s1]

Table S1. Primer sequences for qRT-PCR experiments.

| Gene ID            | F-primer             | R-primer             |
|--------------------|----------------------|----------------------|
| TaActin1           | CACCGCCGAACGGGAAAT   | AAGGACCTCAGGGCAACG   |
| TraesCS2B02G509100 | CACTTCCTCATCGTGGCCTA | GTGGCGGTATCCTCACCATT |
| TraesCS1D02G019100 | TCCACCTTCTCCCATTCCCC | CGCGTAGTTCCTCCGGATTT |
| TraesCS3D02G513900 | GCGGTACAAGGTACGGGAAT | CGGCGAAATGGGGTCTACAT |
| TraesCS2B02G428700 | GGGGAGGCTTTCGGGTTTTA | GTCGACGAACTCACCTCAA  |
| TraesCS2B02G132500 | ACTACCTGTCCCAGCTCGT  | CATCTGCCGGTCTGACATGA |
| TraesCS4A02G394600 | CTTCTATGACGGCGAGGACC | GTACTCTGCCACGACGATCC |

Table S2. Quality statistics of filtered transcriptome Reads

| Sample Name | Clean Reads | Clean Base     | Read Length | Q20(%) | Q30(%) | GC(%) |
|-------------|-------------|----------------|-------------|--------|--------|-------|
| S_24h_1     | 39,381,657  | 11,814,497,100 | PE150       | 97.33  | 93.02  | 53.14 |
| S_24h_2     | 40,094,431  | 12,028,329,300 | PE150       | 97.28  | 92.88  | 53.48 |
| S_24h_3     | 40,116,715  | 12,035,014,500 | PE150       | 97.28  | 92.87  | 53.33 |
| S_36h_1     | 40,079,471  | 12,023,851,300 | PE150       | 96.76  | 91.81  | 53.44 |
| S_36h_2     | 40,088,085  | 12,026,425,500 | PE150       | 96.86  | 92.04  | 53.53 |
| S_36h_3     | 40,078,768  | 12,023,630,400 | PE150       | 96.81  | 91.93  | 54.33 |
| S_48h_1     | 40,137,198  | 12,041,159,400 | PE150       | 97.00  | 92.38  | 53.00 |
| S_48h_2     | 40,159,573  | 12,047,871,900 | PE150       | 96.71  | 91.67  | 52.54 |
| S_48h_3     | 40,059,088  | 12,017,702,400 | PE150       | 96.87  | 92.00  | 52.63 |
| S_60h_1     | 40,206,922  | 12,062,076,600 | PE150       | 96.94  | 92.14  | 54.03 |
| S_60h_2     | 40,239,658  | 12,071,897,400 | PE150       | 97.01  | 92.29  | 54.16 |
| S_60h_3     | 40,209,368  | 12,062,810,400 | PE150       | 97.01  | 92.30  | 53.92 |
| SM_24h_1    | 40,218,401  | 12,065,220,300 | PE150       | 96.86  | 92.03  | 52.90 |
| SM_24h_2    | 40,062,310  | 12,018,693,000 | PE150       | 96.68  | 91.57  | 52.52 |
| SM_24h_3    | 40,172,120  | 12,053,736,000 | PE150       | 97.07  | 92.52  | 52.62 |
| SM_36h_1    | 40,203,351  | 12,061,005,300 | PE150       | 96.91  | 92.16  | 54.60 |
| SM_36h_2    | 40,127,584  | 12,038,275,200 | PE150       | 96.53  | 91.26  | 53.81 |
| SM_36h_3    | 40,116,211  | 12,034,863,300 | PE150       | 96.74  | 91.75  | 54.58 |
| SM_48h_1    | 40,250,430  | 12,075,129,300 | PE150       | 96.83  | 91.96  | 53.39 |
| SM_48h_2    | 40,118,993  | 12,035,697,900 | PE150       | 96.79  | 91.85  | 52.89 |
| SM_48h_3    | 40,253,498  | 12,016,049,400 | PE150       | 96.75  | 91.75  | 52.33 |
| SM_60h_1    | 40,262,733  | 12,078,819,900 | PE150       | 97.08  | 92.49  | 54.10 |
| SM_60h_2    | 40,090,027  | 12,027,088,100 | PE150       | 96.97  | 92.21  | 54.17 |
| SM_60h_3    | 40,187,896  | 12,056,368,800 | PE150       | 96.97  | 92.17  | 53.85 |

Table S3. DEGs up-regulate the most enriched GO terms.

| ID         | Description                                                                                | p.adjust    | Count |
|------------|--------------------------------------------------------------------------------------------|-------------|-------|
| GO:0009768 | photosynthesis, light harvesting in photosystem I                                          | 1.44E-30    | 33    |
| GO:0015977 | carbon fixation                                                                            | 1.15E-17    | 38    |
| GO:0009734 | auxin-activated signaling pathway                                                          | 1.05E-12    | 49    |
| GO:0071365 | cellular response to auxin stimulus                                                        | 1.05E-12    | 49    |
| GO:0015995 | chlorophyll biosynthetic process                                                           | 1.09E-12    | 24    |
| GO:0030244 | cellulose biosynthetic process                                                             | 5.90E-09    | 36    |
| GO:0009833 | plant-type primary cell wall biogenesis                                                    | 6.59E-09    | 20    |
| GO:0005516 | calmodulin binding                                                                         | 5.22E-08    | 47    |
| GO:0005372 | water transmembrane transporter activity                                                   | 1.81E-07    | 14    |
| GO:0005887 | integral component of plasma membrane                                                      | 2.09E-06    | 49    |
| GO:0009735 | response to cytokinin                                                                      | 5.76E-06    | 24    |
| GO:0016731 | oxidoreductase activity, acting on iron-sulfur proteins as donors, NAD or NADP as acceptor | 1.05E-05    | 8     |
| GO:0005986 | sucrose biosynthetic process                                                               | 0.000116613 | 7     |
| GO:0010206 | photosystem II repair                                                                      | 0.000696603 | 8     |
| GO:0042542 | response to hydrogen peroxide                                                              | 0.01786588  | 10    |
| GO:0009753 | response to jasmonic acid                                                                  | 0.023541287 | 14    |
| GO:0009736 | cytokinin-activated signaling pathway                                                      | 0.02953734  | 8     |
| GO:0009651 | response to salt stress                                                                    | 0.031003989 | 30    |
| GO:0009863 | salicylic acid mediated signaling pathway                                                  | 0.035821609 | 5     |
| GO:0009738 | abscisic acid-activated signaling pathway                                                  | 0.036499141 | 18    |

Table S4. DEGs down-regulate the most enriched GO terms.

| ID         | Description                                      | p.adjust    | Count |
|------------|--------------------------------------------------|-------------|-------|
| GO:0046395 | carboxylic acid catabolic process                | 3.24E-42    | 121   |
| GO:0008514 | organic anion transmembrane transporter activity | 2.22E-27    | 92    |
| GO:0006970 | response to osmotic stress                       | 2.46E-27    | 103   |
| GO:0015171 | amino acid transmembrane transporter activity    | 2.82E-24    | 60    |
| GO:0009063 | cellular amino acid catabolic process            | 1.24E-22    | 76    |
| GO:0034440 | lipid oxidation                                  | 3.81E-20    | 37    |
| GO:0009062 | fatty acid catabolic process                     | 3.72E-18    | 34    |
| GO:0009414 | response to water deprivation                    | 1.00E-15    | 62    |
| GO:0006813 | potassium ion transport                          | 8.27E-11    | 33    |
| GO:0012501 | programmed cell death                            | 1.64E-09    | 22    |
| GO:0015996 | chlorophyll catabolic process                    | 7.22E-09    | 14    |
| GO:0042402 | cellular biogenic amine catabolic process        | 1.14E-07    | 18    |
| GO:0005262 | calcium channel activity                         | 0.000261    | 6     |
| GO:0098719 | sodium ion import across plasma membrane         | 0.000696603 | 8     |
| GO:0044092 | negative regulation of molecular function        | 0.01786588  | 10    |
| GO:0098659 | inorganic cation import across plasma membrane   | 0.023541287 | 14    |

|            |                                                                    |             |    |
|------------|--------------------------------------------------------------------|-------------|----|
| GO:0010150 | leaf senescence                                                    | 0.02953734  | 8  |
| GO:0009852 | auxin catabolic process                                            | 0.031003989 | 30 |
| GO:0009938 | negative regulation of gibberellic acid mediated signaling pathway | 0.035821609 | 5  |
| GO:0030245 | cellulose catabolic process                                        | 0.036499141 | 18 |

Table S5. DEGs up-regulate the most enriched KEGG terms.

| ID      | Description                                     | p.adjust | Count |
|---------|-------------------------------------------------|----------|-------|
| ko00196 | Photosynthesis - antenna proteins               | 2.41E-64 | 68    |
| ko00860 | Porphyrin and chlorophyll metabolism            | 1.54E-10 | 45    |
| ko00402 | Benzoxazinoid biosynthesis                      | 3.27E-09 | 29    |
| ko00531 | Glycosaminoglycan degradation                   | 4.81E-06 | 24    |
| ko00906 | Carotenoid biosynthesis                         | 0.000144 | 32    |
| ko01040 | Biosynthesis of unsaturated fatty acids         | 0.004811 | 21    |
| ko00770 | Pantothenate and CoA biosynthesis               | 0.02485  | 17    |
| ko00740 | Riboflavin metabolism                           | 0.030295 | 21    |
| ko00604 | Glycosphingolipid biosynthesis - ganglio series | 0.030295 | 12    |
| ko00310 | Lysine degradation                              | 0.038896 | 23    |
| ko00908 | Zeatin biosynthesis                             | 0.044733 | 20    |

Table S6. DEGs down-regulate the most enriched KEGG terms.

| ID      | Description                             | p.adjust | Count |
|---------|-----------------------------------------|----------|-------|
| ko00943 | Isoflavonoid biosynthesis               | 1.20E-10 | 38    |
| ko00515 | Mannose type O-glycan biosynthesis      | 1.20E-10 | 29    |
| ko00590 | Arachidonic acid metabolism             | 1.39E-10 | 46    |
| ko00860 | Porphyrin and chlorophyll metabolism    | 2.79E-10 | 55    |
| ko00514 | Other types of O-glycan biosynthesis    | 1.67E-09 | 41    |
| ko00906 | Carotenoid biosynthesis                 | 1.82E-08 | 51    |
| ko00944 | Flavone and flavonol biosynthesis       | 5.31E-08 | 34    |
| ko00402 | Benzoxazinoid biosynthesis              | 1.18E-07 | 32    |
| ko00650 | Butanoate metabolism                    | 2.06E-06 | 29    |
| ko00440 | Phosphonate and phosphinate metabolism  | 5.32E-06 | 12    |
| ko00903 | Limonene and pinene degradation         | 0.000813 | 9     |
| ko04122 | Sulfur relay system                     | 0.002451 | 11    |
| ko01040 | Biosynthesis of unsaturated fatty acids | 0.002716 | 27    |
| ko00430 | Taurine and hypotaurine metabolism      | 0.002873 | 12    |
| ko00410 | beta-Alanine metabolism                 | 0.002895 | 38    |
| ko00310 | Lysine degradation                      | 0.011406 | 32    |
| ko00770 | Pantothenate and CoA biosynthesis       | 0.011406 | 22    |
| ko00942 | Anthocyanin biosynthesis                | 0.011406 | 10    |
| ko00232 | Caffeine metabolism                     | 0.026369 | 8     |
| ko00750 | Vitamin B6 metabolism                   | 0.03313  | 12    |

|         |                                     |          |    |
|---------|-------------------------------------|----------|----|
| ko00660 | C5-Branched dibasic acid metabolism | 0.034995 | 8  |
| ko00100 | Steroid biosynthesis                | 0.039027 | 34 |
| ko04136 | Autophagy - other                   | 0.044899 | 36 |

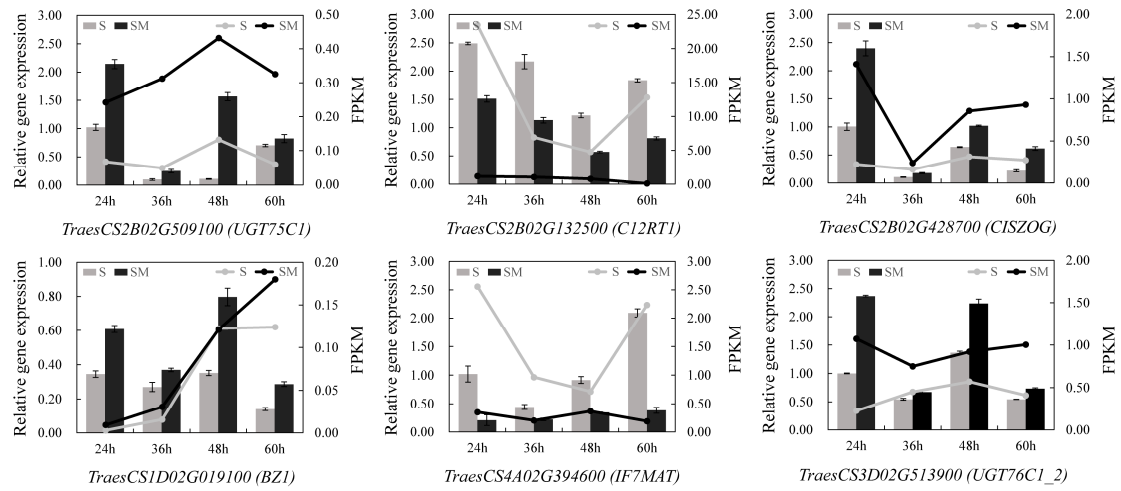

Figure S1. Effects of melatonin on gene expression under salt stress in wheat seedling by qRT-PCR.

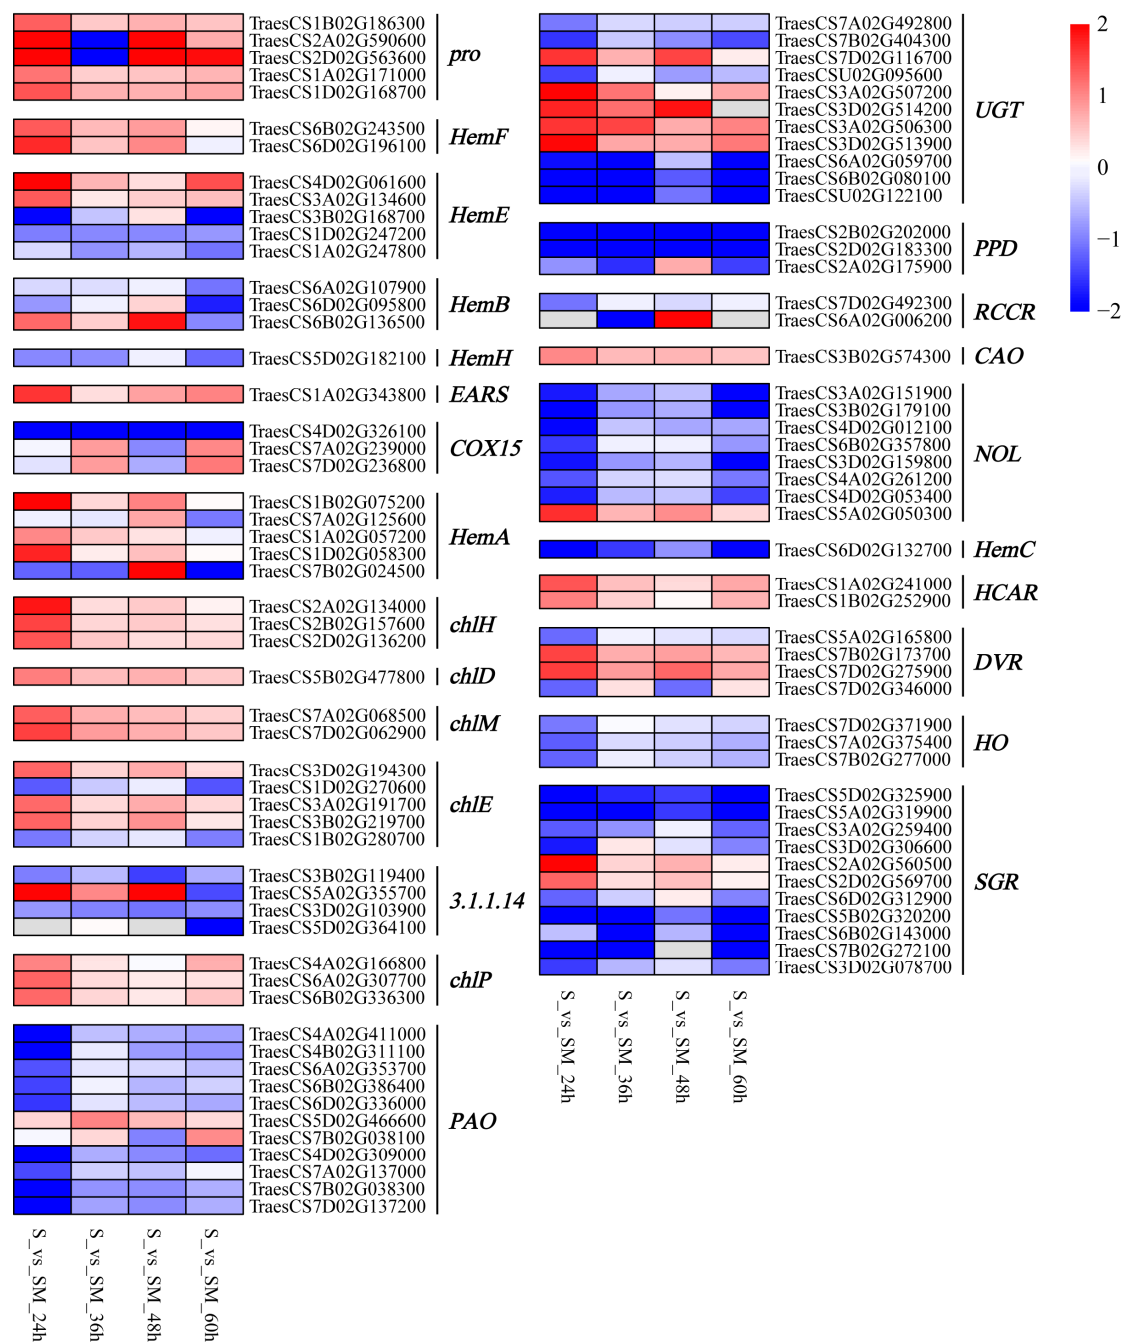

Figure S2. Expression profiles of DEGs associated with Porphyrin and chlorophyll metabolism.

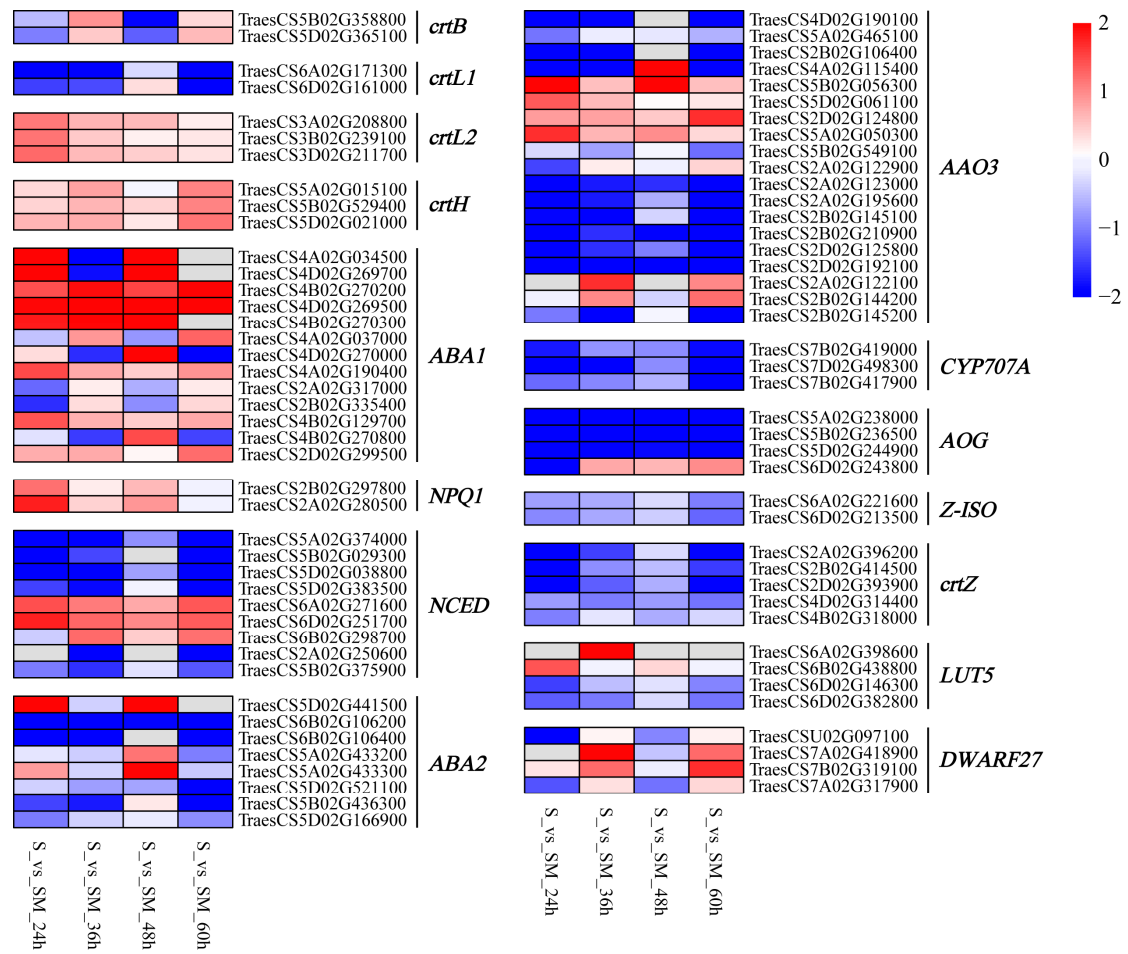

Figure S3. Expression profiles of DEGs associated with Carotenoid biosynthesis.
